# Supplementary material for: Thionoglycine as a multifunctional spectroscopic reporter of screw-sense preference in helical foldamers
Source: Royal Society of Chemistry journal article supplement (doi:10.1039/c3ob42167h), 2013-11-25

## Thionoglycine as a multifunctional spectroscopic reporter: CD validation of an NMR method for analysing screw-sense preference in helical foldamers

Matteo De Poli and Jonathan Clayden\*

### Supporting Information

UV spectra of compounds 1-6 in MeOH

concentration  $\sim 6.5 \cdot 10^{-4}$  M

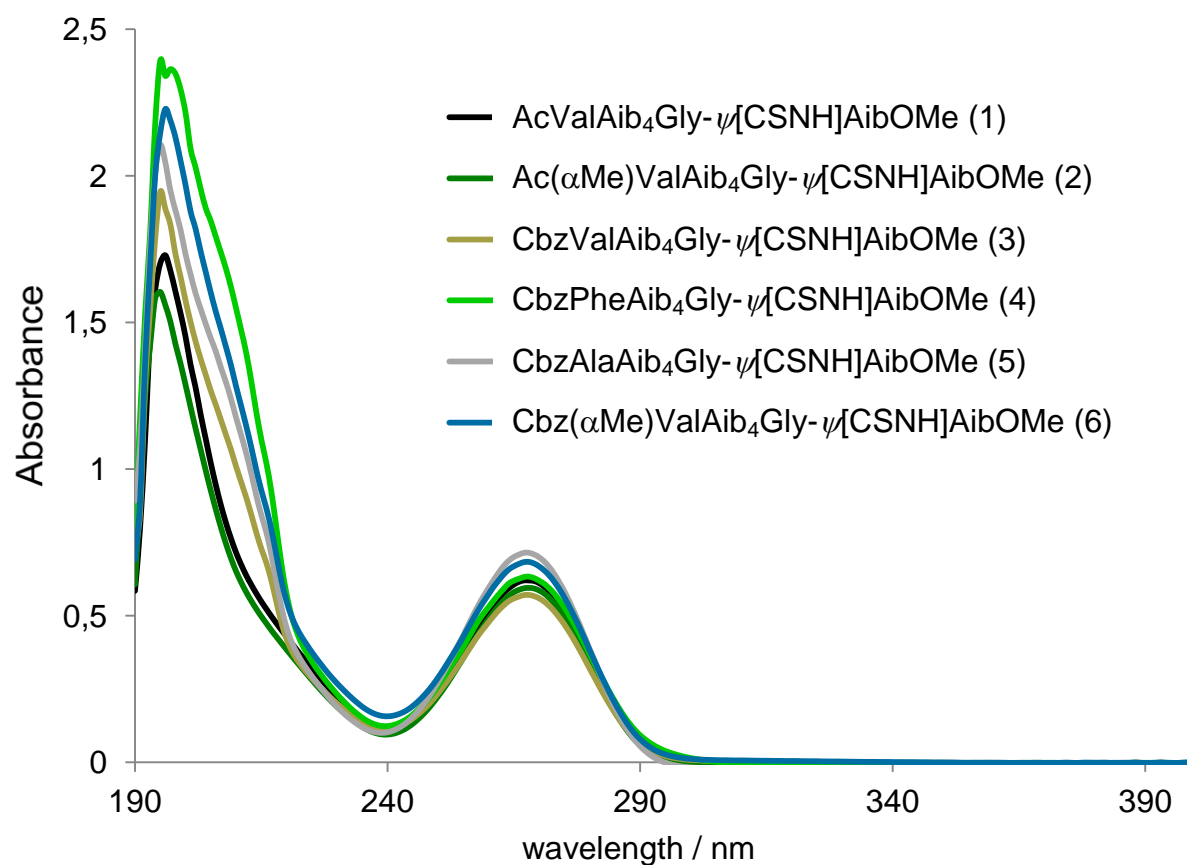

## Copies of NMR spectra

### $^1\text{H}$ NMR spectrum of Boc-Gly-Aib-OMe ( $\text{CDCl}_3$ , 300 MHz)

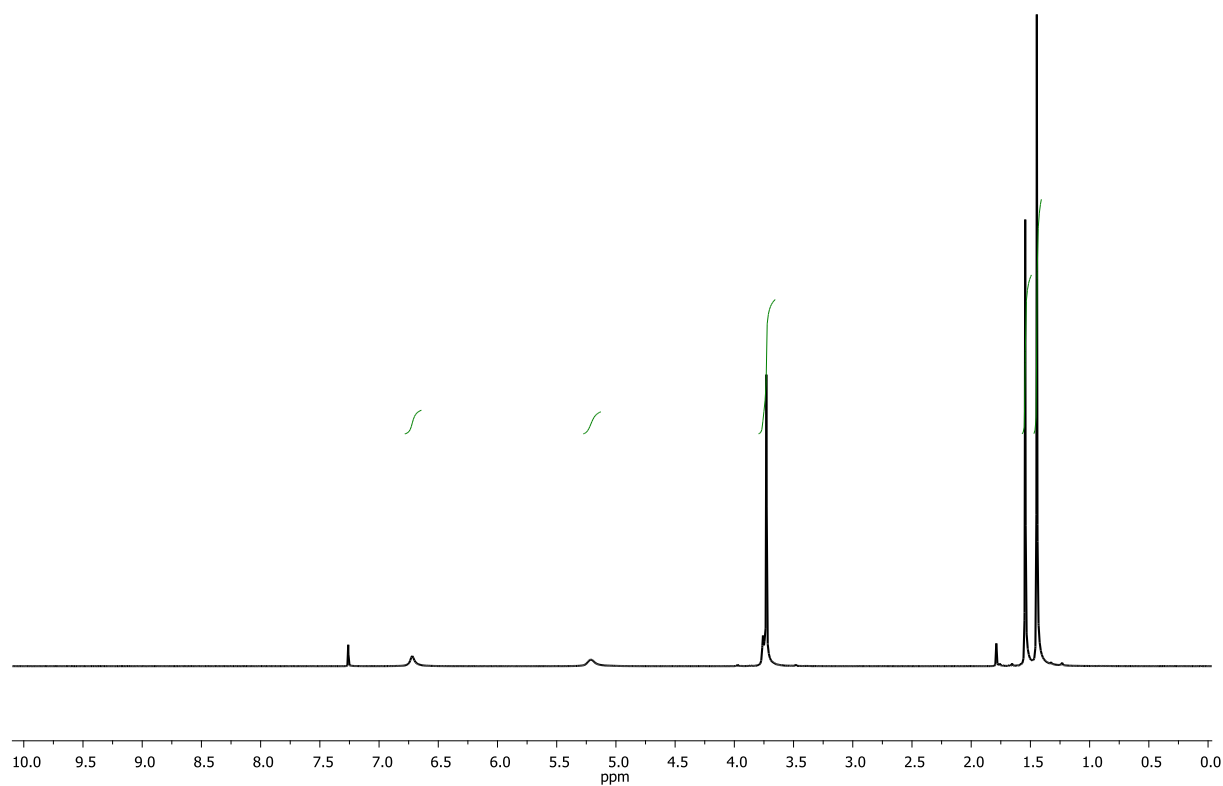

### $^{13}\text{C}$ NMR spectrum of Boc-Gly-Aib-OMe ( $\text{CDCl}_3$ , 125 MHz)

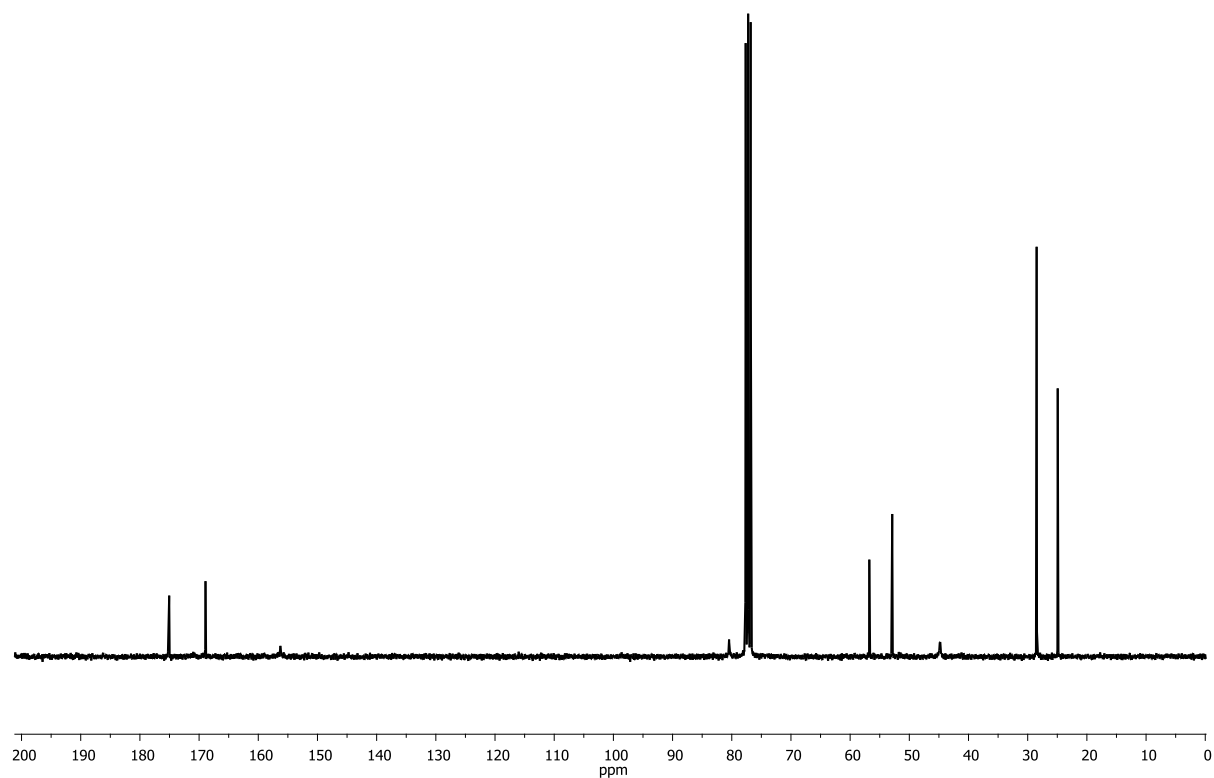

**$^1\text{H}$  NMR spectrum of Boc-Gly- $\psi$ [CSNH]Aib-OMe ( $\text{CDCl}_3$ , 300 MHz)**

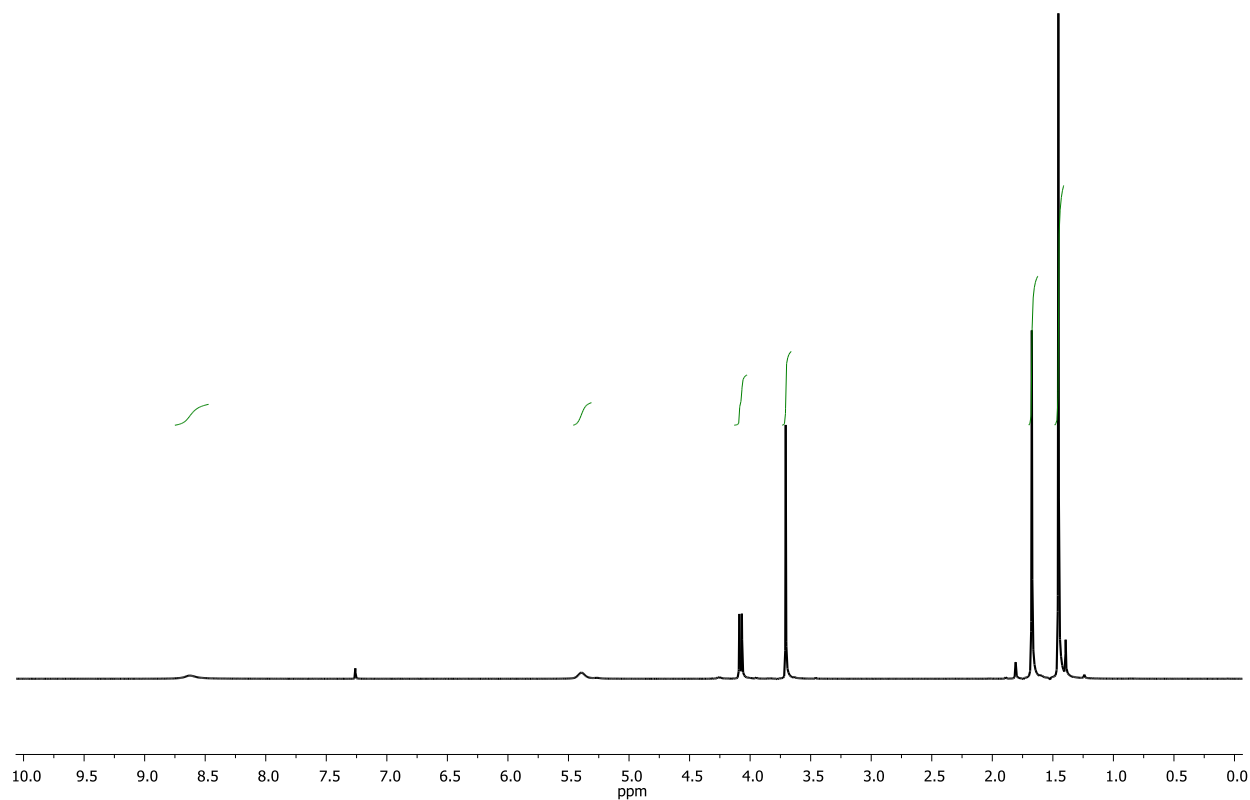

**$^{13}\text{C}$  NMR spectrum of Boc-Gly- $\psi$ [CSNH]Aib-OMe ( $\text{CDCl}_3$ , 300 MHz)**

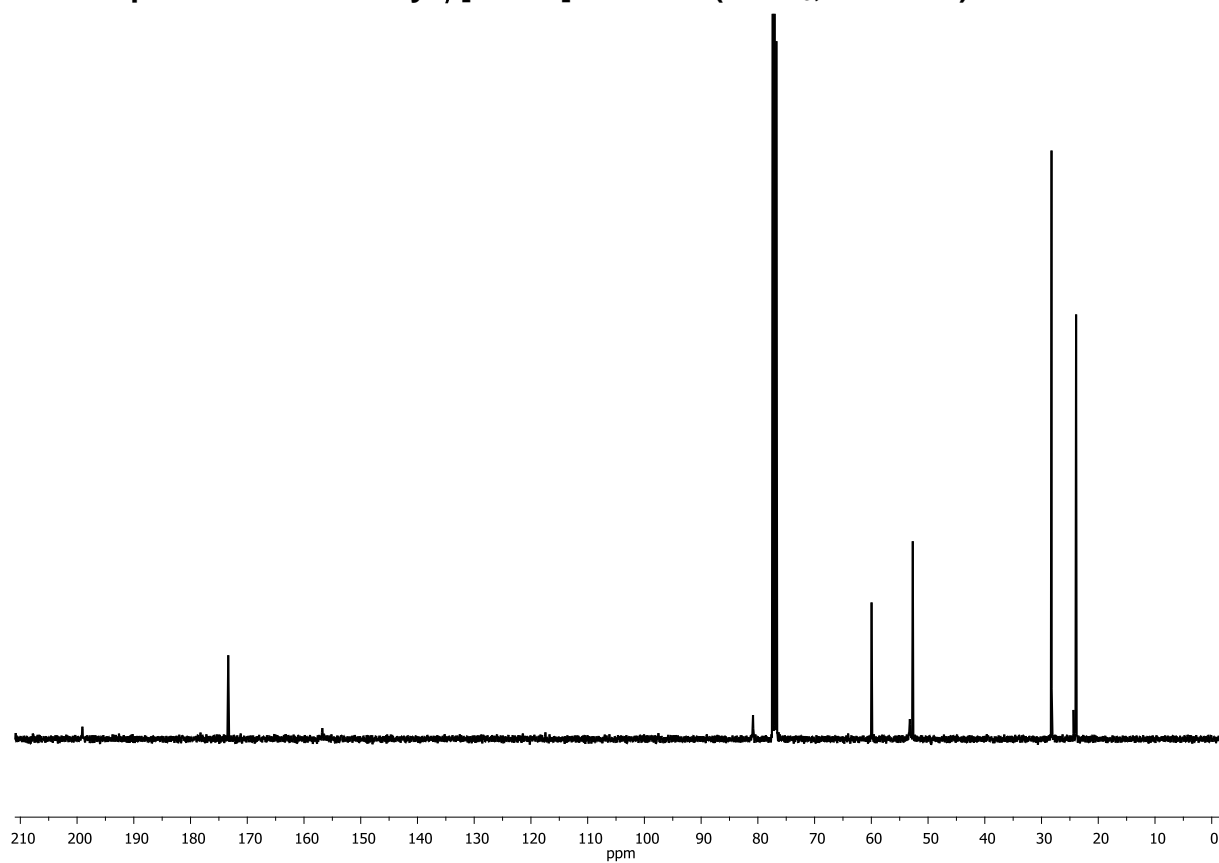

**<sup>1</sup>H NMR spectrum of HCl·H-Gly-ψ[CSNH]Aib-OMe (CD<sub>3</sub>OD, 500 MHz)**

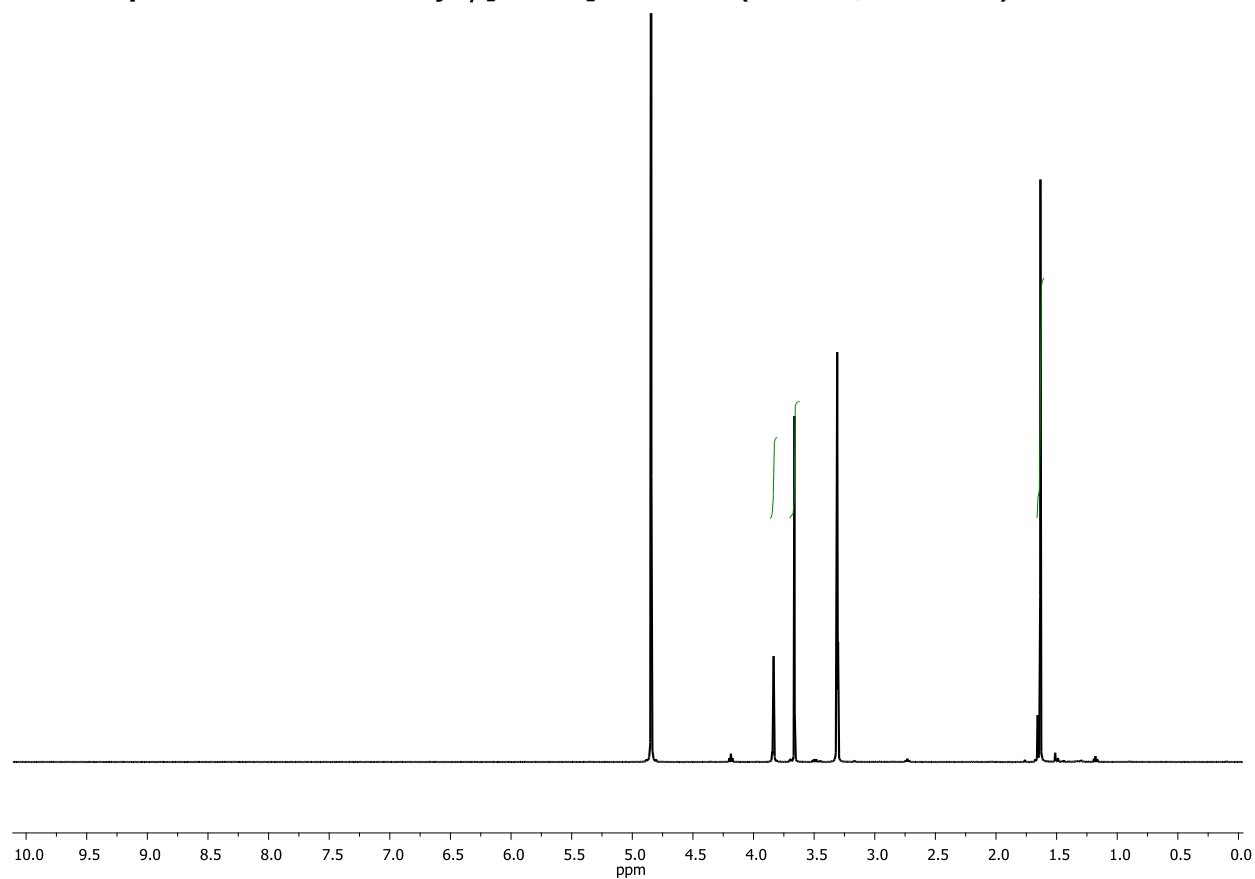

**<sup>13</sup>C NMR spectrum of HCl·H-Gly-ψ[CSNH]Aib-OMe (CD<sub>3</sub>OD, 101 MHz)**

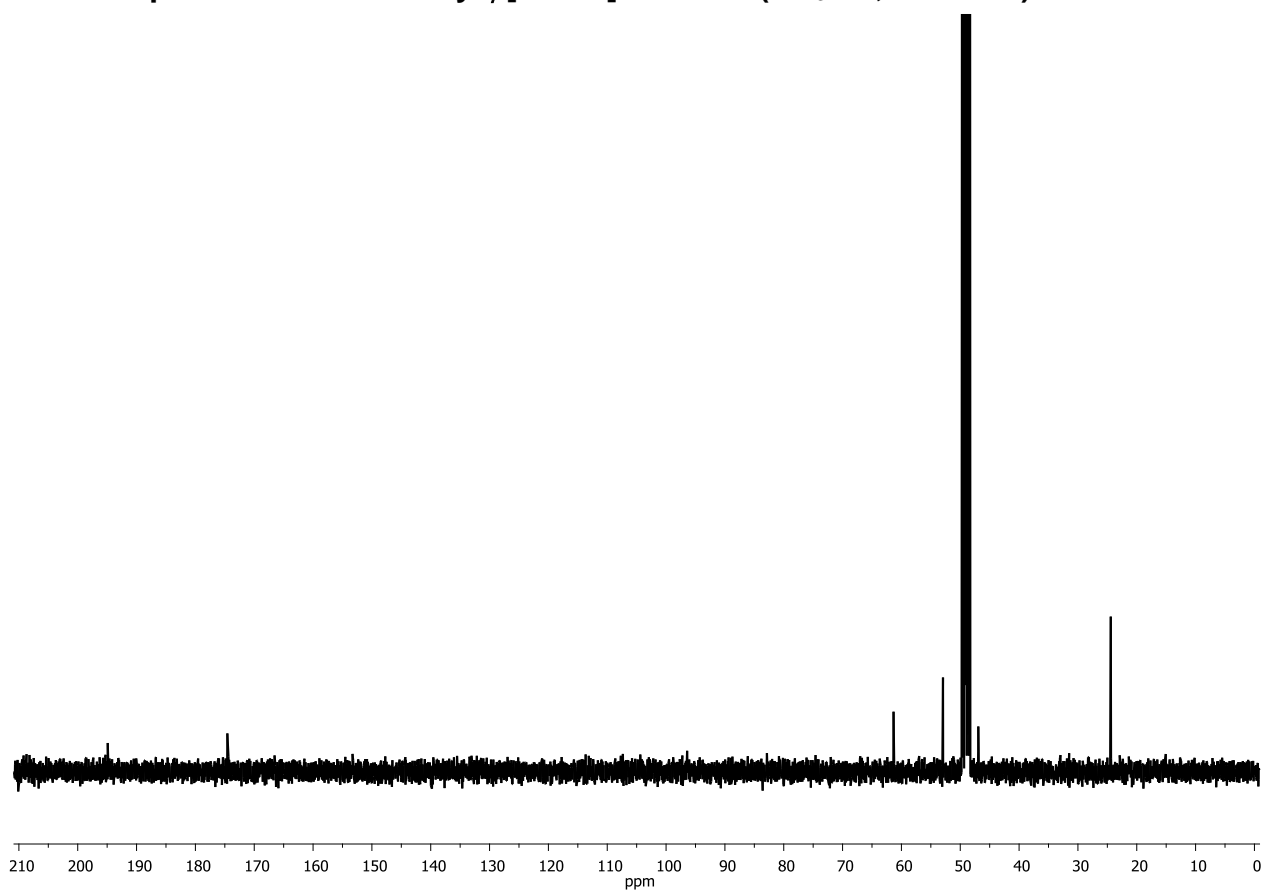

**$^1\text{H}$  NMR spectrum of Ac-Val-Aib<sub>4</sub>-OH (CD<sub>3</sub>OD, 300 MHz)**

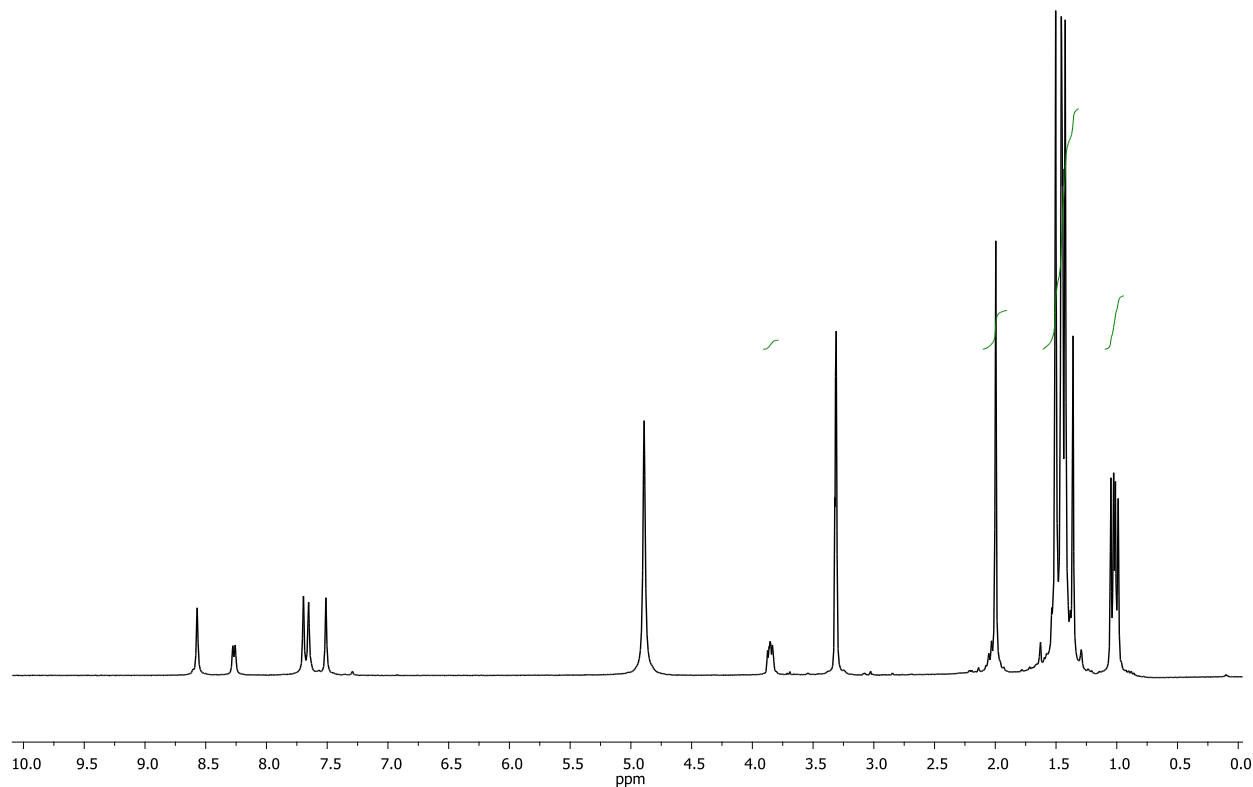

**$^{13}\text{C}$  NMR spectrum of Ac-Val-Aib<sub>4</sub>-OH (CD<sub>3</sub>OD, 75 MHz)**

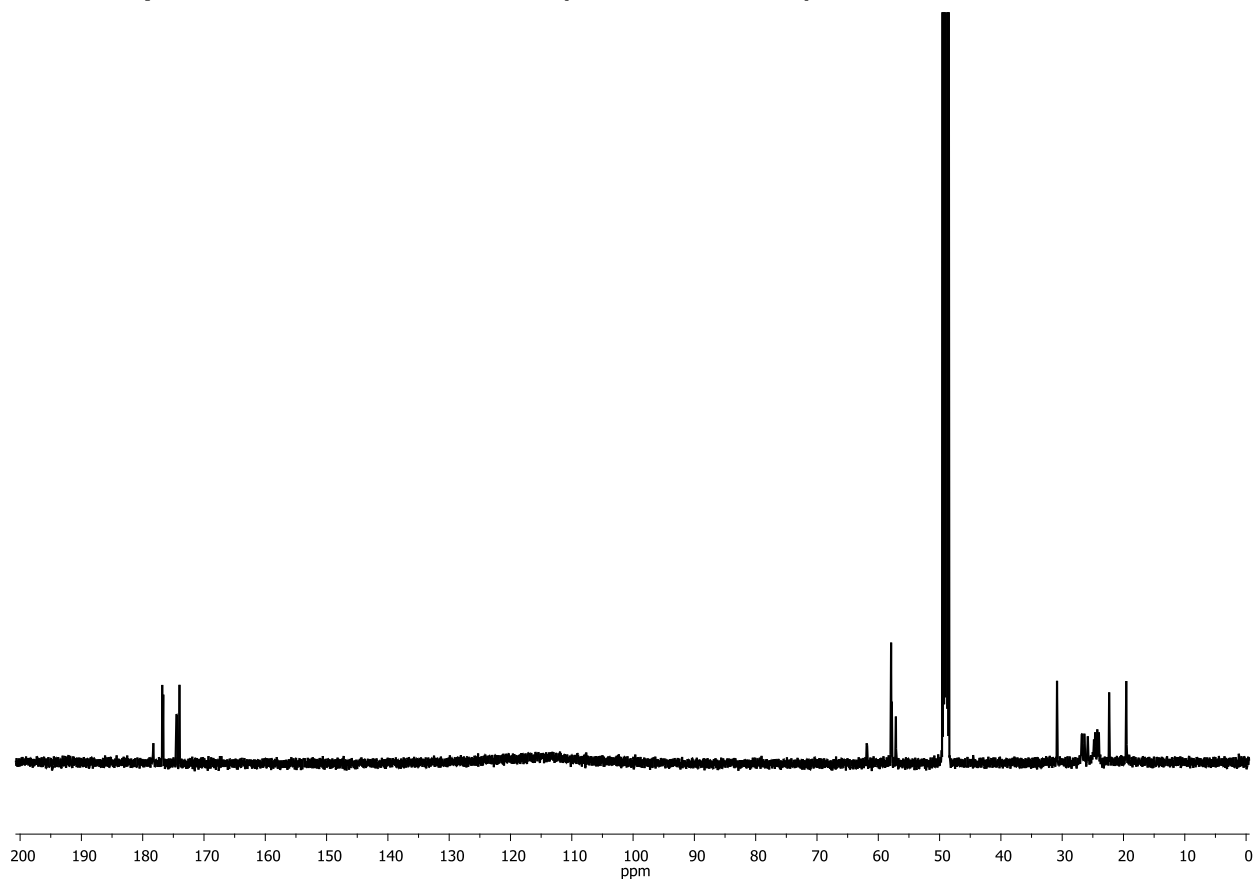

**$^1\text{H}$  NMR spectrum of Ac-Val-Aib<sub>4</sub>-Gly- $\psi$ [CSNH]Aib-OMe (CD<sub>3</sub>OD, 500 MHz)**

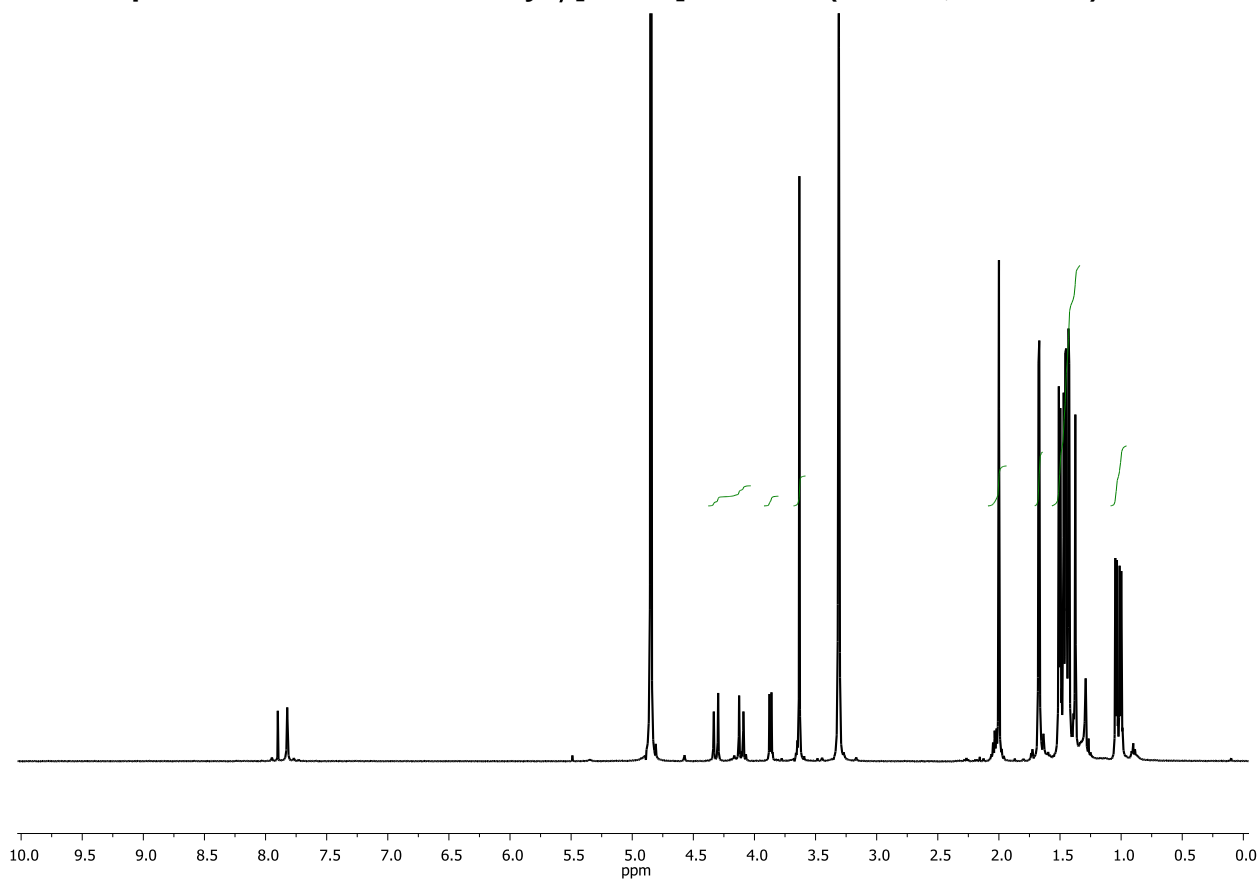

**$^{13}\text{C}$  NMR spectrum of Ac-Val-Aib<sub>4</sub>-Gly- $\psi$ [CSNH]Aib-OMe (CD<sub>3</sub>OD, 125 MHz)**

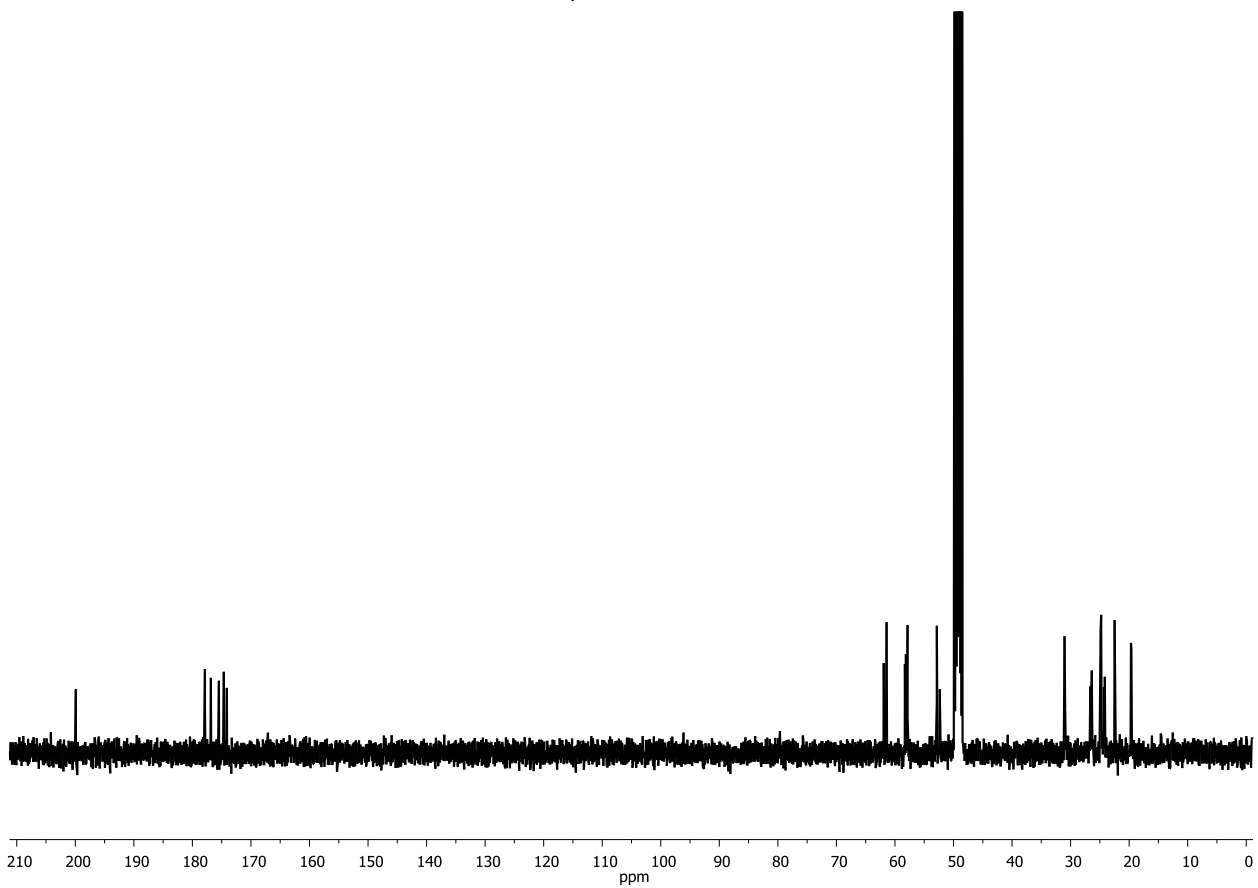

**<sup>1</sup>H NMR spectrum of Ac-(αMe)Val-Aib<sub>4</sub>-Gly-ψ[CSNH]Aib-OMe (CD<sub>3</sub>OD, 500 MHz)**

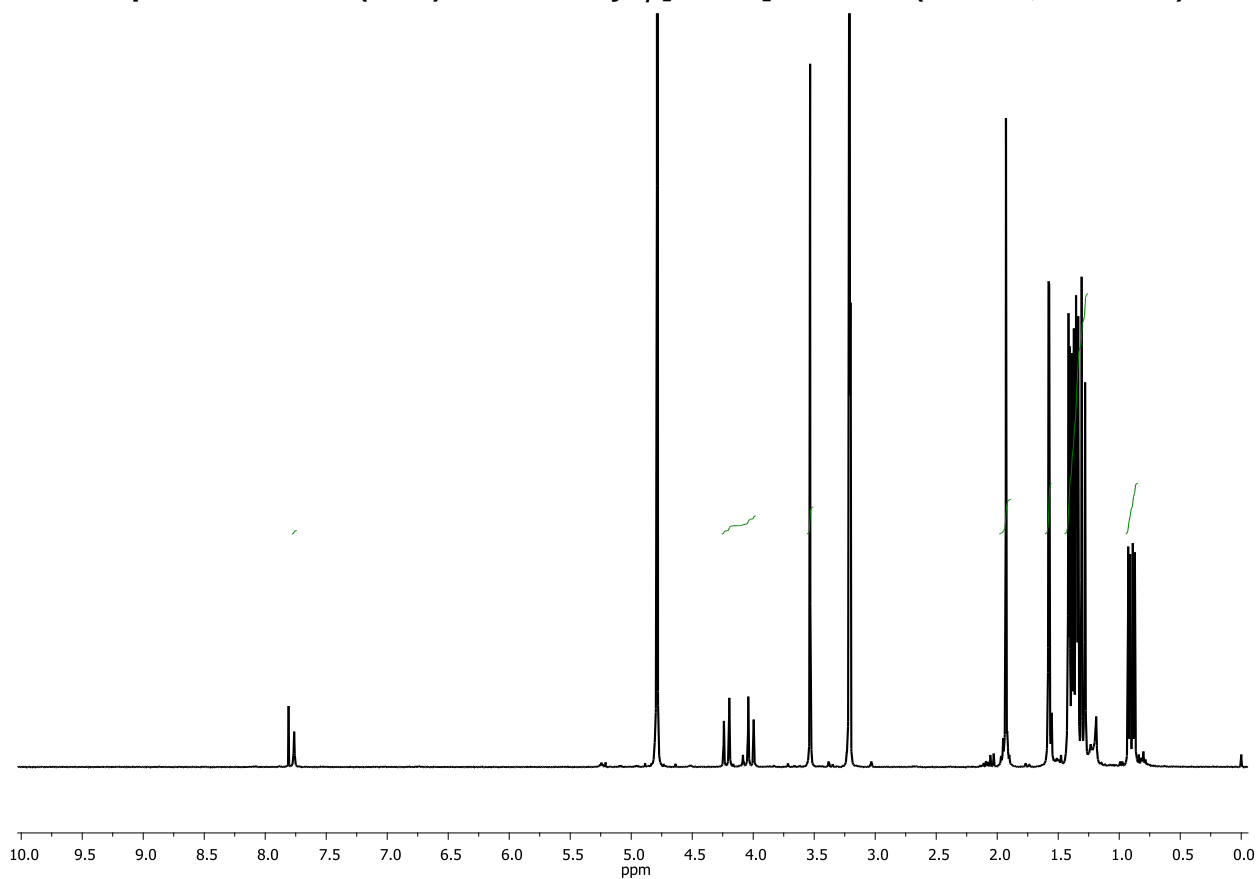

**<sup>13</sup>C NMR spectrum of Ac-(αMe)Val-Aib<sub>4</sub>-Gly-ψ[CSNH]Aib-OMe (CD<sub>3</sub>OD, 125 MHz)**

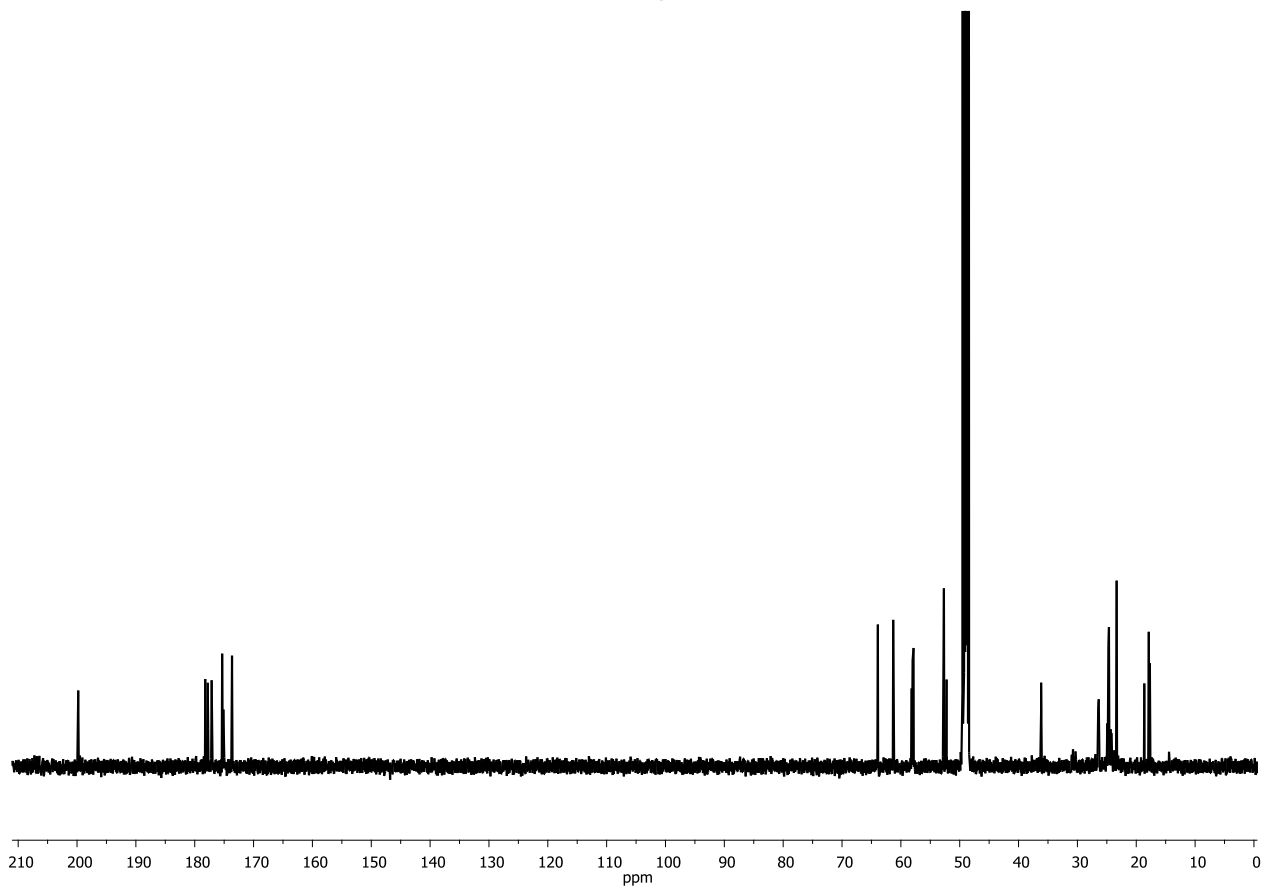

**$^1\text{H}$  NMR spectrum of  $\text{N}_3\text{Aib}_4\text{-Gly-}\psi[\text{CSNH}]\text{Aib-OMe}$  ( $\text{CDCl}_3$ , 500 MHz)**

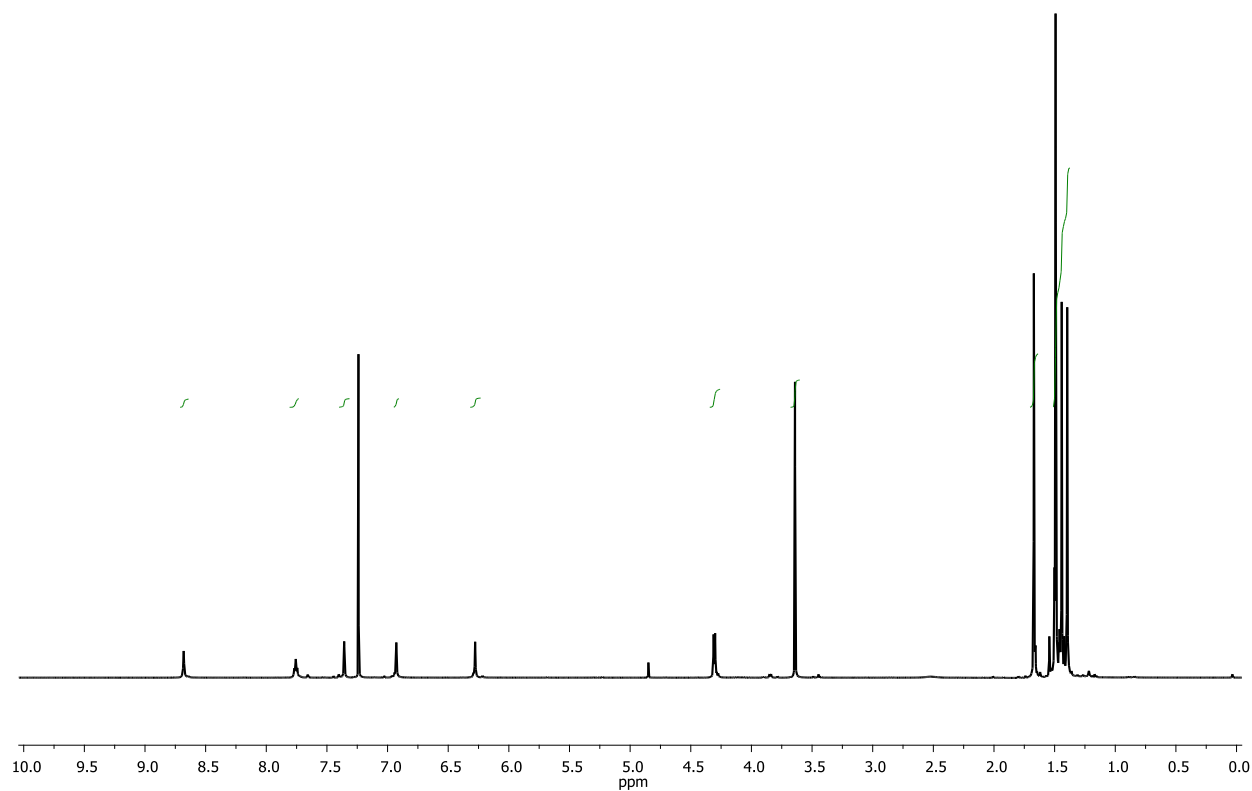

**$^{13}\text{C}$  NMR spectrum of  $\text{N}_3\text{Aib}_4\text{-Gly-}\psi[\text{CSNH}]\text{Aib-OMe}$  ( $\text{CDCl}_3$ , 125 MHz)**

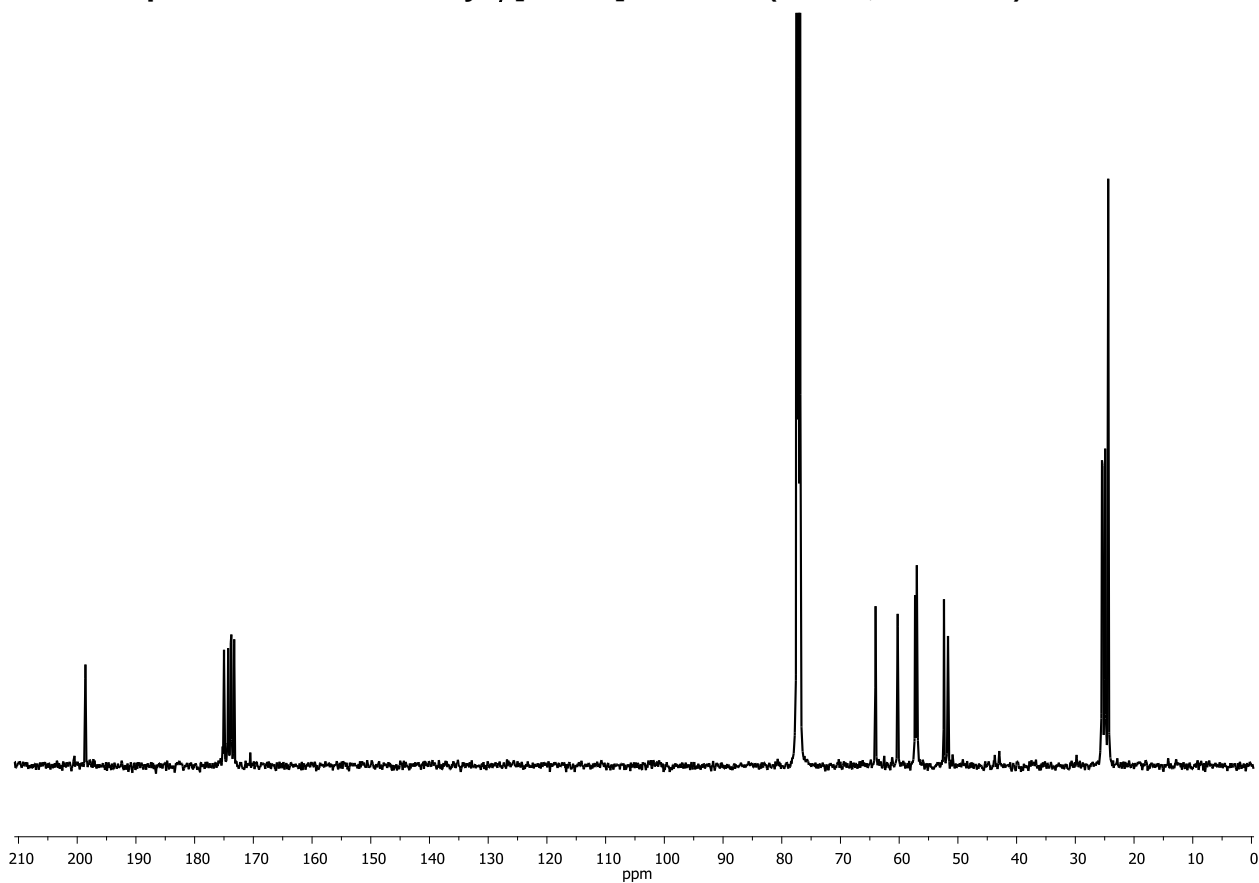



**$^1\text{H}$  NMR spectrum of H-Aib<sub>4</sub>-Gly- $\psi$ [CSNH]Aib-OMe (CDCl<sub>3</sub>, 500 MHz)**

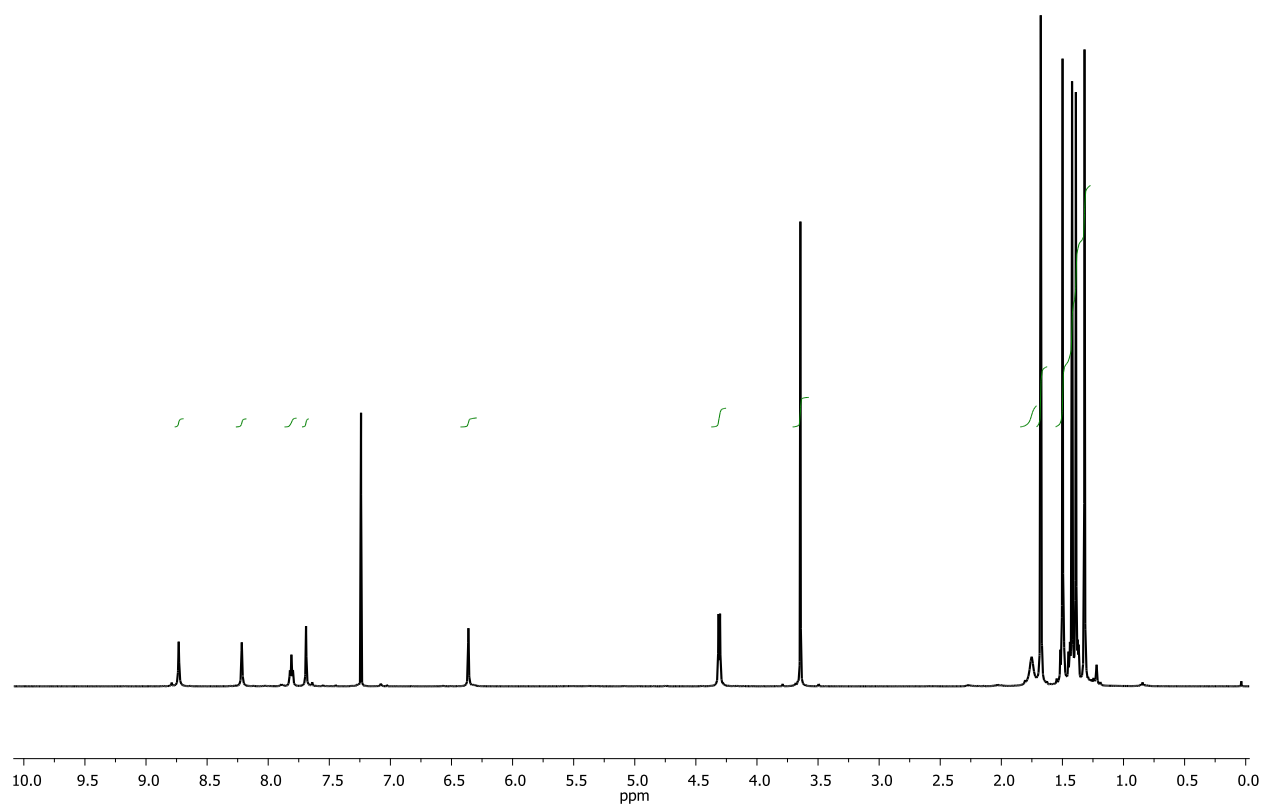

**$^{13}\text{C}$  NMR spectrum of H-Aib<sub>4</sub>-Gly- $\psi$ [CSNH]Aib-OMe (CDCl<sub>3</sub>, 75 MHz)**

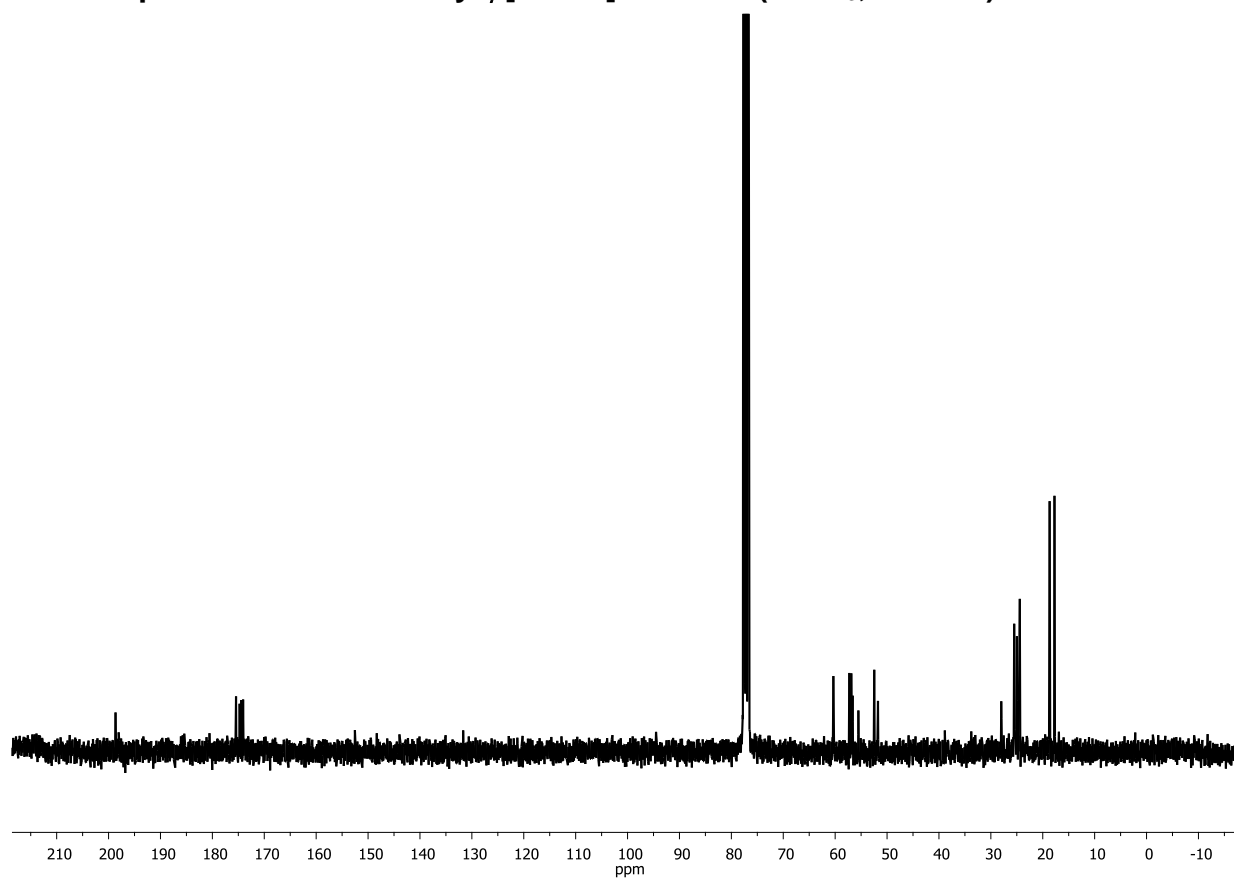

**$^1\text{H}$  NMR spectrum of Cbz-Val-Aib<sub>4</sub>-Gly- $\psi$ [CSNH]Aib-OMe (CD<sub>3</sub>OD, 500 MHz)**

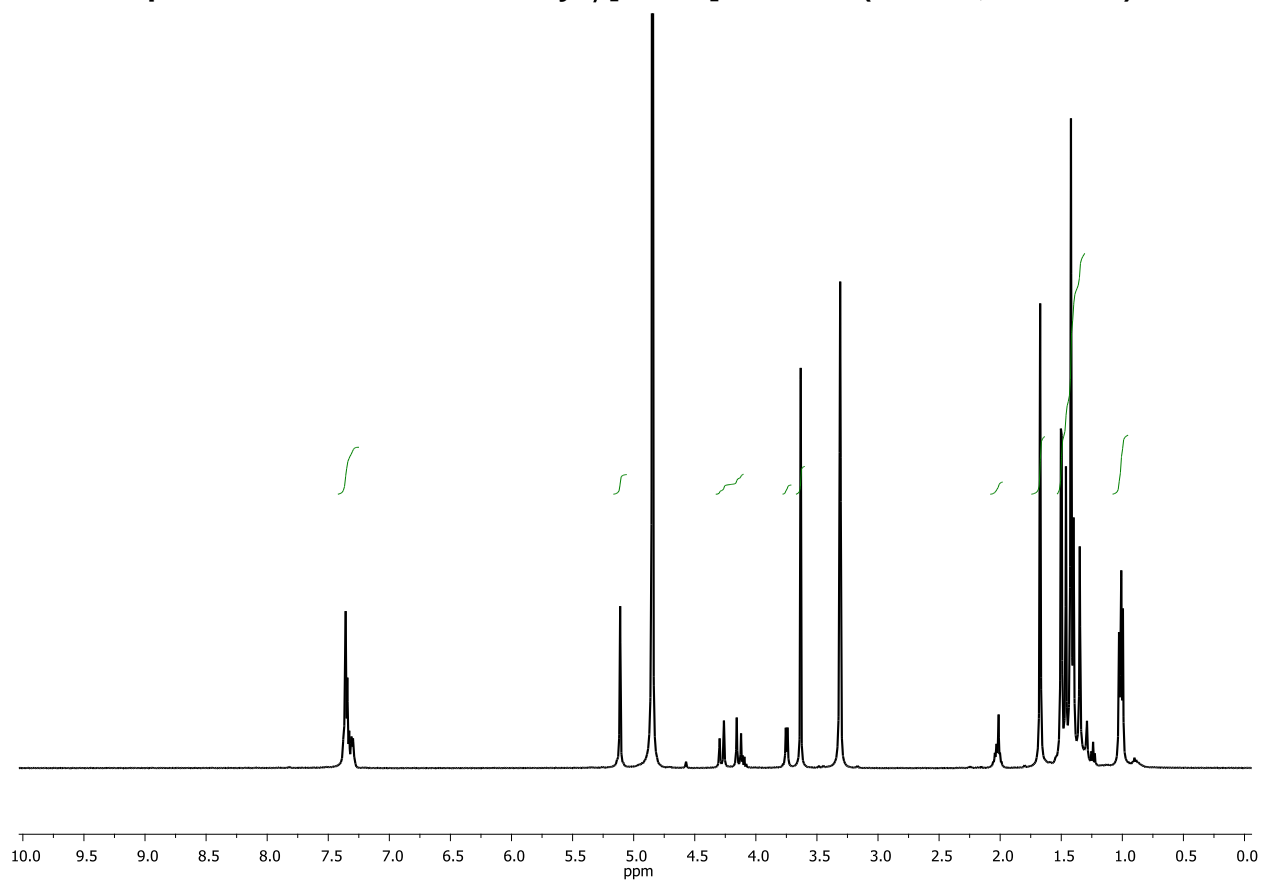

**$^{13}\text{C}$  NMR spectrum of Cbz-Val-Aib<sub>4</sub>-Gly- $\psi$ [CSNH]Aib-OMe (CD<sub>3</sub>OD, 125 MHz)**

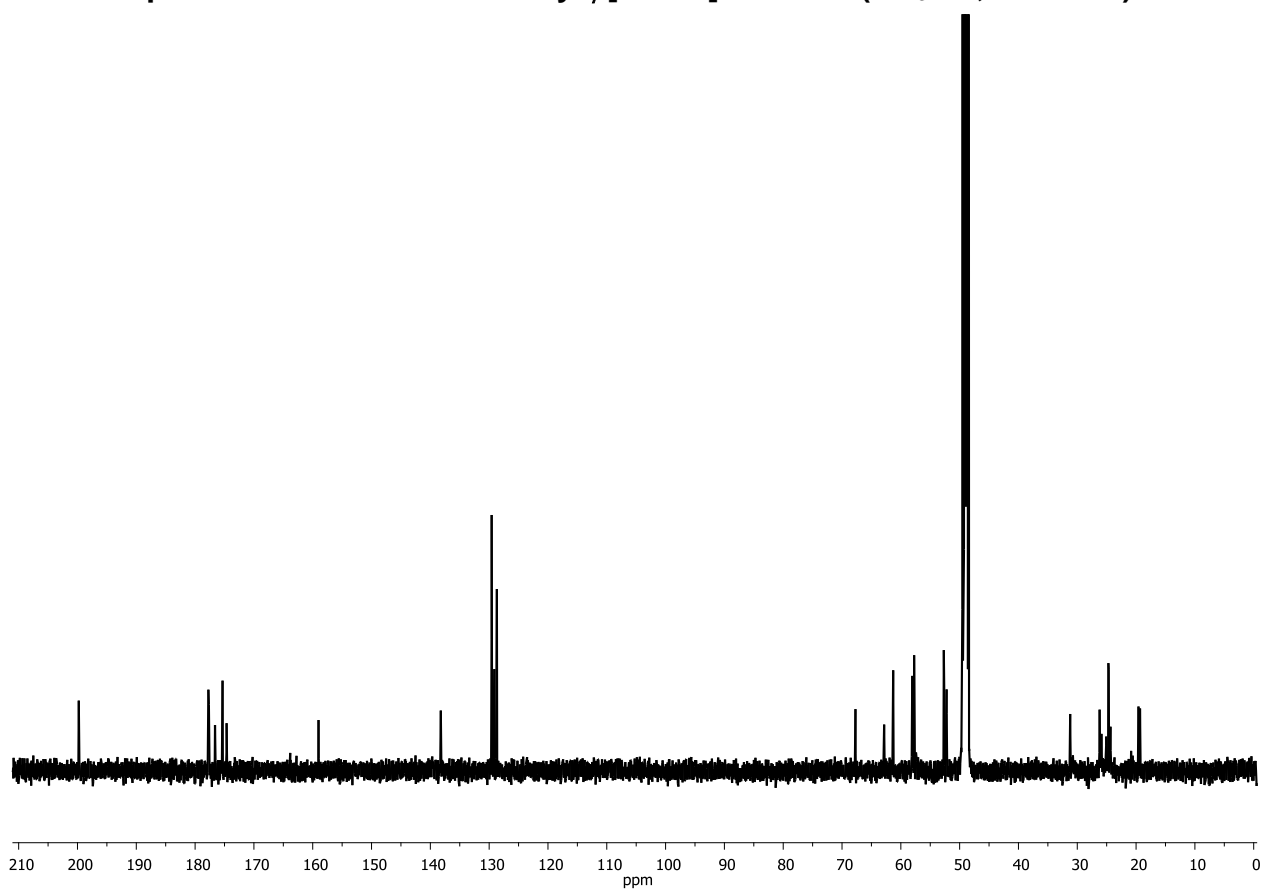

**<sup>1</sup>H NMR spectrum of Cbz-Phe-Aib<sub>4</sub>-Gly-ψ[CSNH]Aib-OMe (CD<sub>3</sub>OD, 500 MHz)**

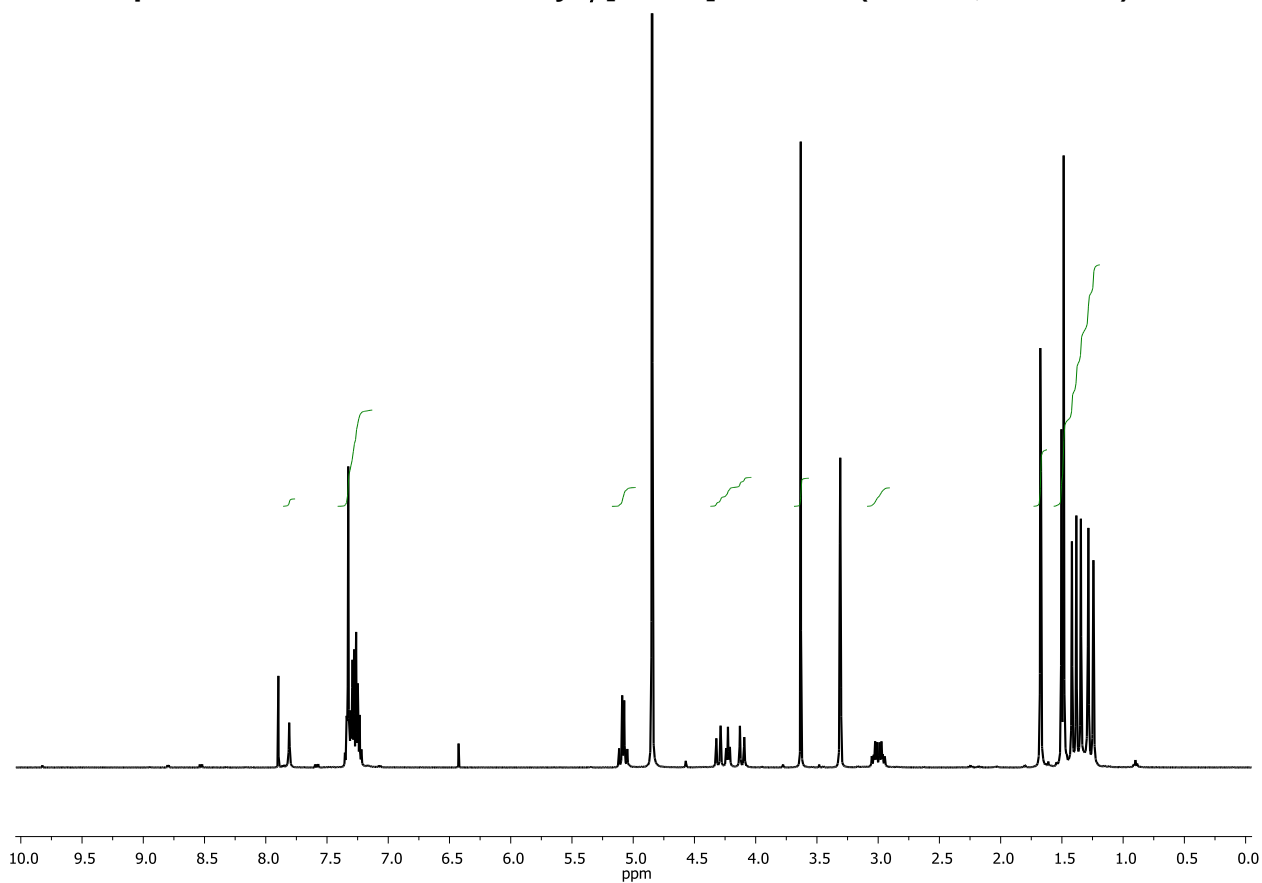

**<sup>13</sup>C NMR spectrum of Cbz-Phe-Aib<sub>4</sub>-Gly-ψ[CSNH]Aib-OMe (CD<sub>3</sub>OD, 125 MHz)**

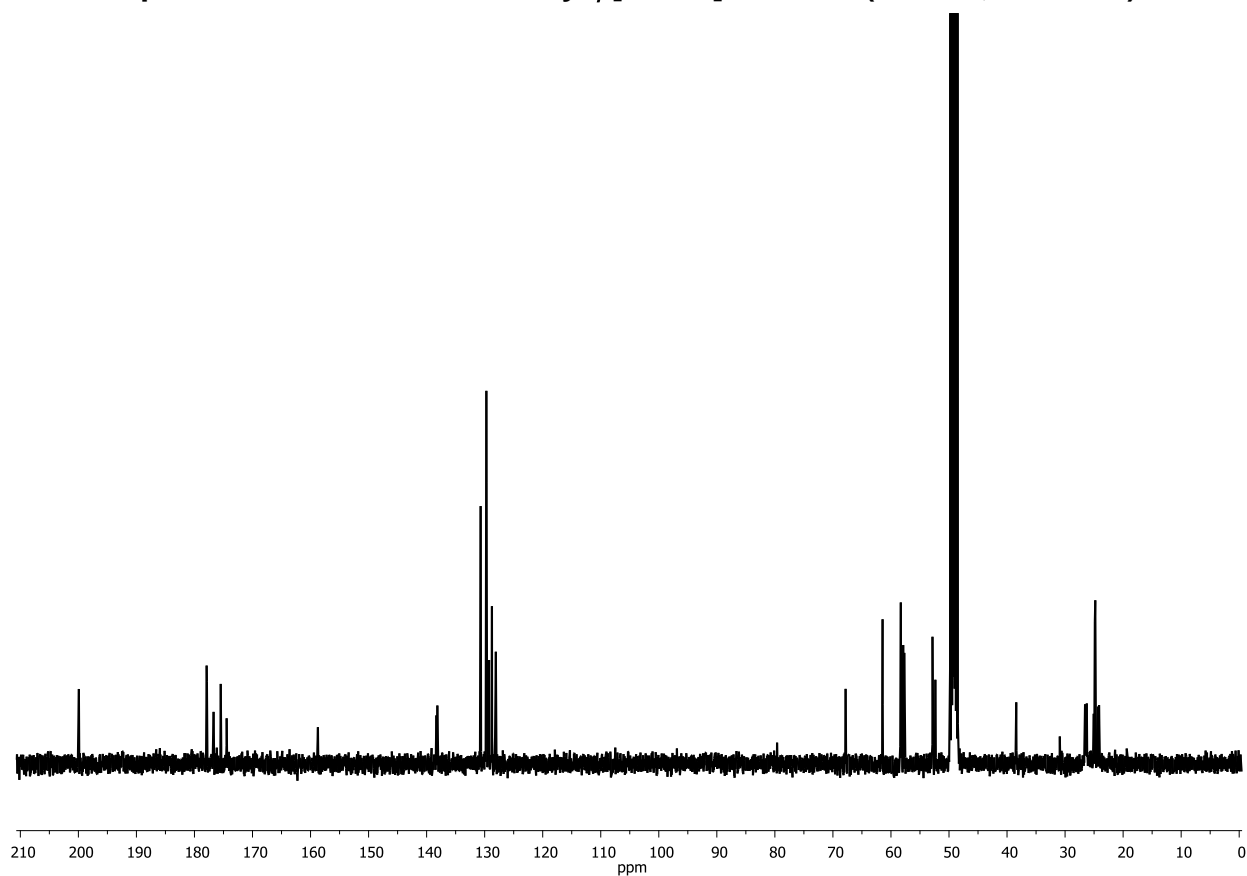

**$^1\text{H}$  NMR spectrum of Cbz-Ala-Aib<sub>4</sub>-Gly- $\psi$ [CSNH]Aib-OMe (CD<sub>3</sub>OD, 500 MHz)**

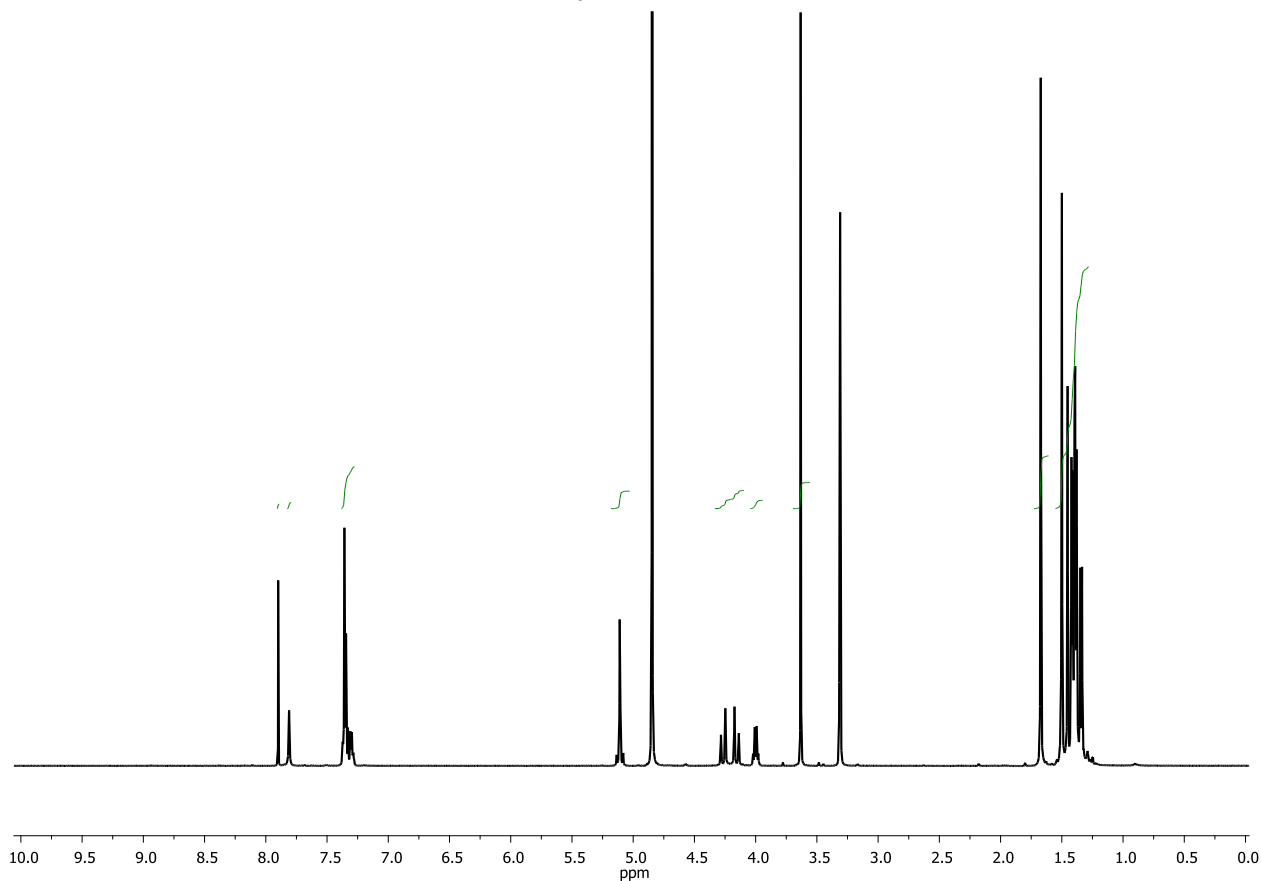

**$^{13}\text{C}$  NMR spectrum of Cbz-Ala-Aib<sub>4</sub>-Gly- $\psi$ [CSNH]Aib-OMe (CD<sub>3</sub>OD, 125 MHz)**

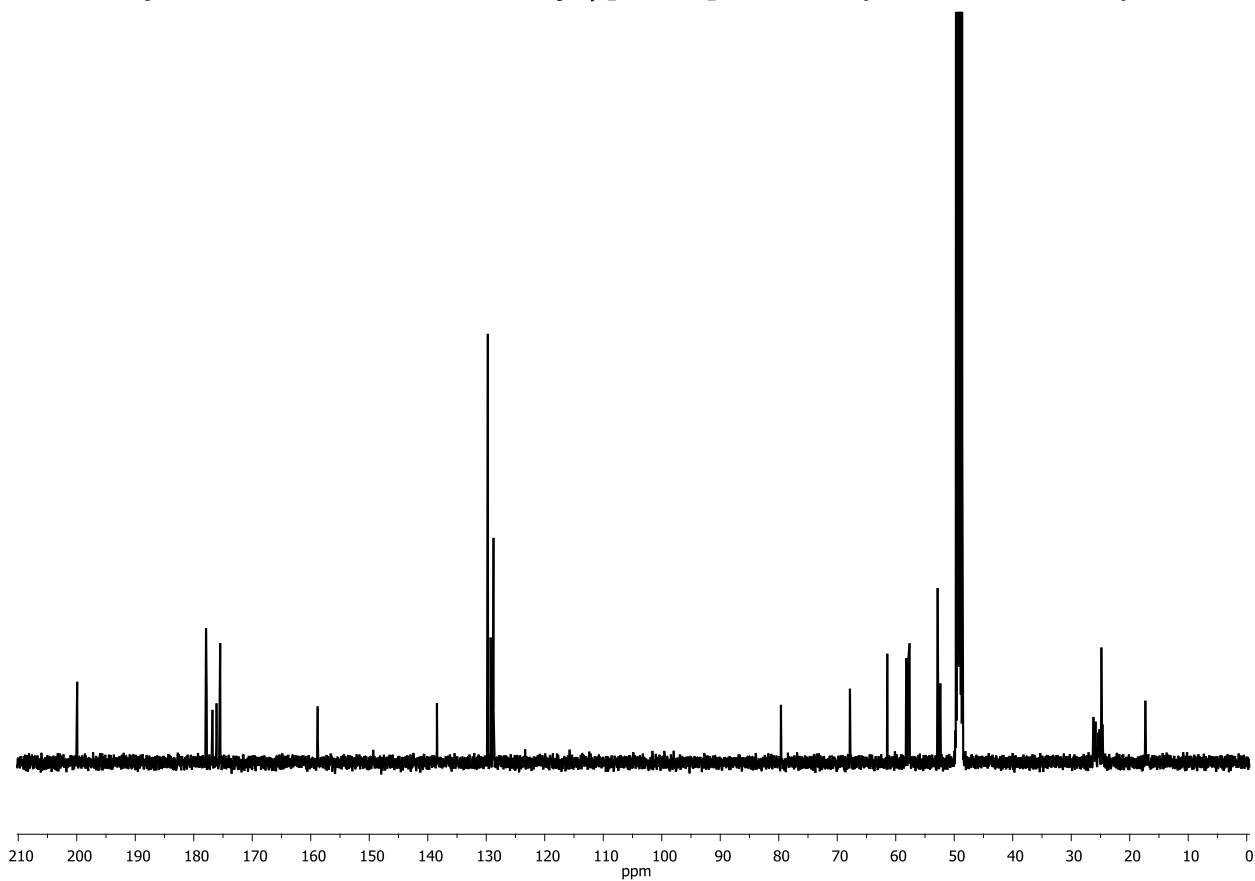

**$^1\text{H}$  NMR spectrum of Cbz-( $\alpha$ Me)Val-Aib<sub>4</sub>-Gly- $\psi$ [CSNH]Aib-OMe (CD<sub>3</sub>OD, 500 MHz)**

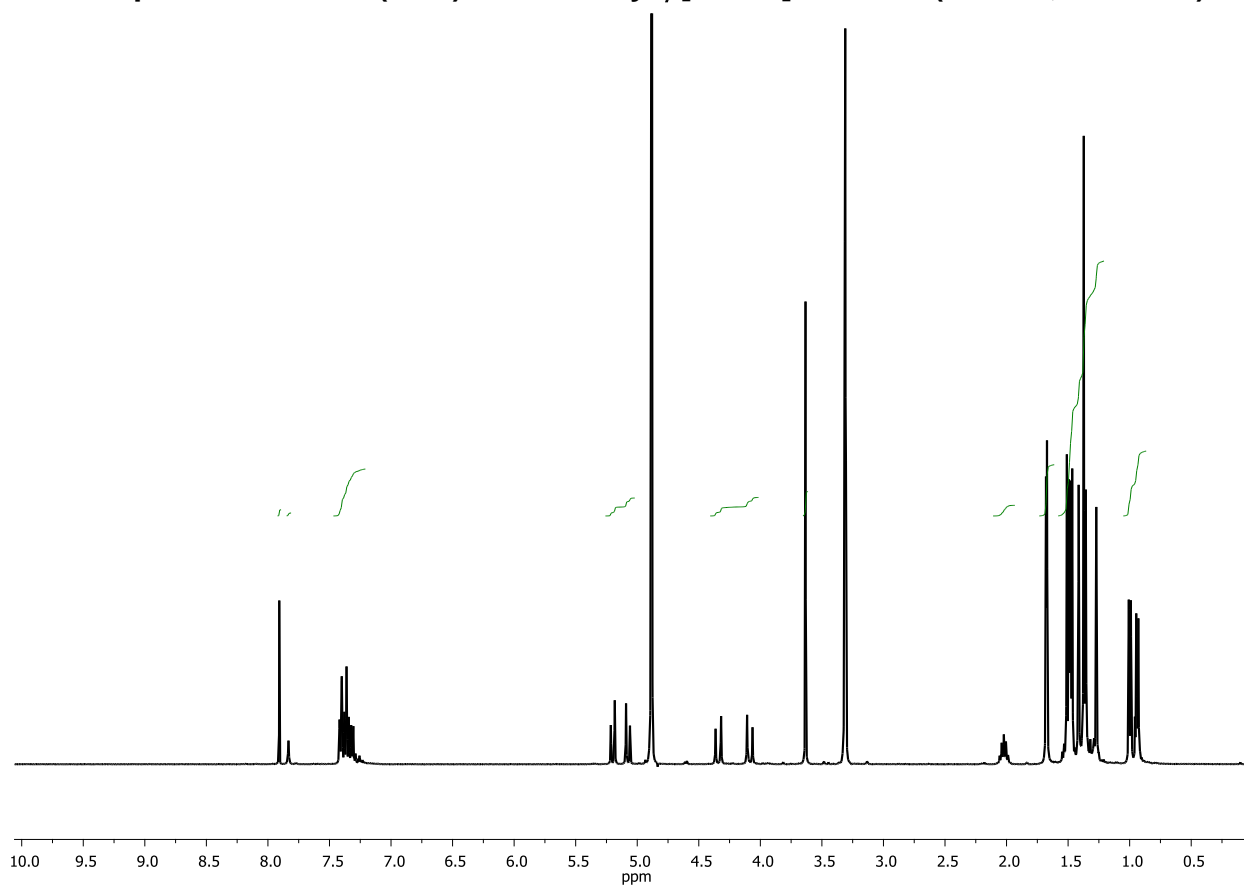

**$^{13}\text{C}$  NMR spectrum of Cbz-( $\alpha$ Me)Ala-Aib<sub>4</sub>-Gly- $\psi$ [CSNH]Aib-OMe (CD<sub>3</sub>OD, 125 MHz)**

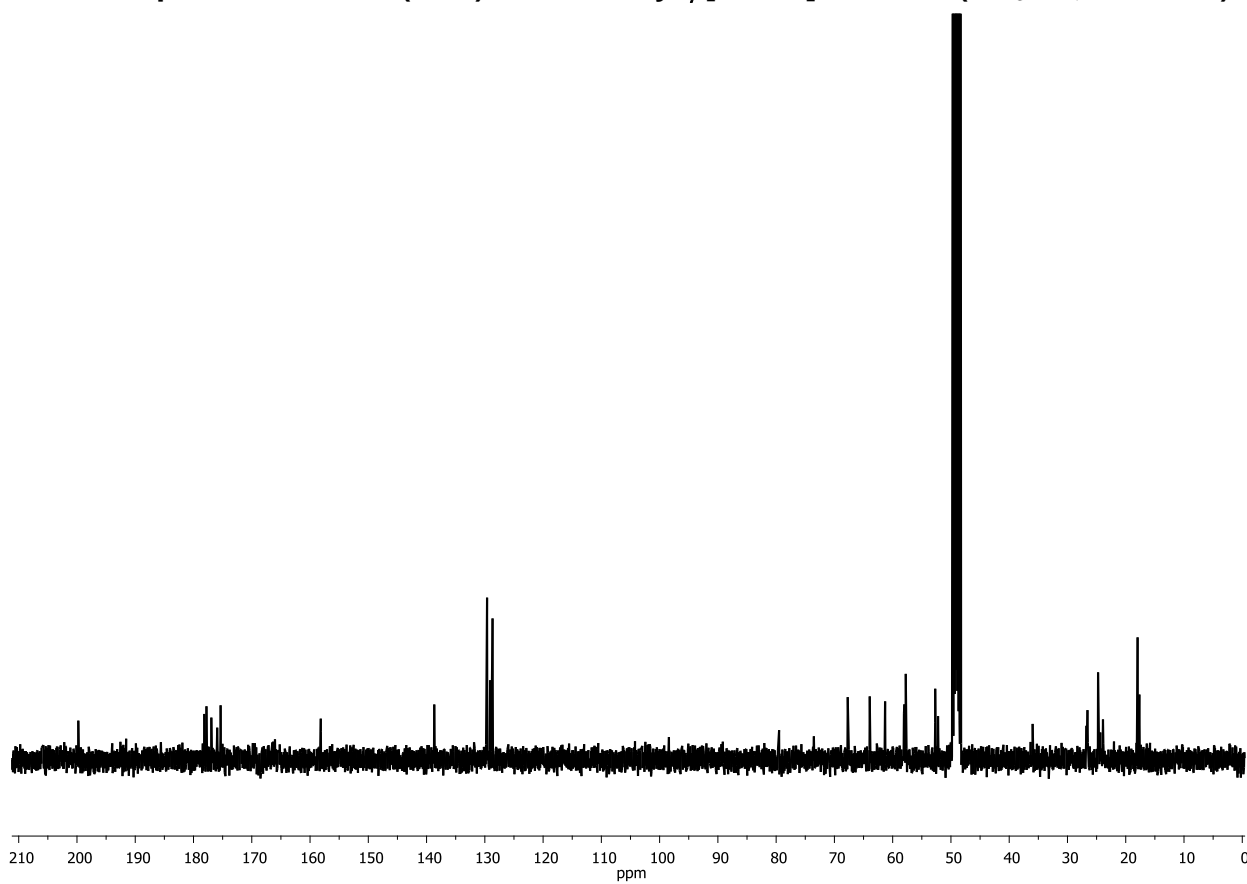

Supplement: c3ob42167h.pdf [file c3ob42167h.pdf]
